# Supplementary material for: Towards optimized viral metagenomes for double-stranded and single-stranded DNA viruses from challenging soils
Source: PeerJ. 2019 Jul 4;7:e7265. doi: 10.7717/peerj.7265 (PMC6612421; doi:10.7717/peerj.7265)
Supplement: Data S1 — Raw data is provided for the qPCR data and the total DNA extracted for Experiment 1. [file peerj-07-7265-s007.xlsx]

## Sheet: qPCR_fig5
palsa	before, rep1	after, rep 1	before, rep 2	after, rep 2	before, rep 3	after, rep 3
+CsCl[H], C1	4.59496		9.9334	2.44114	9.3712	4.98767
+CsCl[H], C2	11.3415	5.5854	10.2161	10.5484	5.21697	11.2317
+CsCl[H], C3	18.0798	7.45209	22.0671		23.1175	7.22259
+CsCl[BB], C1	16.892	64.8797	14.8179	53.182	17.5704	36.0726
+CsCl[BB], C2	16.7721	898.142	17.8506	860.386	19.9799	816.725
+CsCl[BB], C3	21.2114	6.20819	17.6276	11.5616	17.7037	5.42761
-CsCl[H], C1	0.742568	15.3032	0.378731	16.0141		9.96171
-CsCl[H], C2	1.45065	6.19097	0.181281	15.7722	0.561061	14.6657
-CsCl[H], C3		12.6479		7.76902		6.75777
-CsCl[BB], C1	1.99866		3.13109		3.32481
-CsCl[BB], C2	1.88889	65.1396	3.59029	36.3558	1.01517	62.2964
-CsCl[BB], C3	0.751343	22.9233	1.06051	39.0704	0.625208	33.3086

## Sheet: Exp1_DNA
Sample	Total DNA
CTAB_bog_A_ampure	2.914
CTAB_bog_B_ampure	2.875
CTAB_bog_C_ampure	3.759
CTAB_fen_A_ampure	2.031
CTAB_fen_B_ampure	3.172
CTAB_fen_C_ampure	2.512
Wizard_bog_A_ampure	10.43
Wizard_bog_B_ampure	12.04
Wizard_bog_C_ampure	13
Wizard_fen_A_ampure	7.666
Wizard_fen_B_ampure	9.314
Wizard_fen_C_ampure	6.673
PowerSoil_bog_A_ampure	7.382
PowerSoil_bog_B_ampure	6.045
PowerSoil_bog_C_ampure	5.579
PowerSoil_fen_A_ampure	17.56
PowerSoil_fen_B_ampure	8.074
PowerSoil_fen_C_ampure	15.3
